# Supplementary material for: A stochastic multicellular model identifies biological watermarks from disorders in self-organized patterns of phyllotaxis
Source: PubMed Central journal article supplement (PMC4947393; doi:10.7554/elife.14093), 2016-07-06
Supplement: elife-14093-fig5-data1.pdf [file elife-14093-fig5-data1.pdf]

| $\Gamma   E^*$ |     | $\beta$                     |                             |                           |                          |                          |                          |  |  |  |  |  |  |
|----------------|-----|-----------------------------|-----------------------------|---------------------------|--------------------------|--------------------------|--------------------------|--|--|--|--|--|--|
|                |     | 9                           | 10                          | 11                        | 12                       | 13                       | 14                       |  |  |  |  |  |  |
| 0.475          | 1   | 138.3<br>51.8(29.9,21.8)    | 137.8<br>44.5(27.3,17.2)    | 137.6<br>38.8(23.8,15.0)  | 137.4<br>37.8(26.4,11.5) | 137.8<br>34.8(24.4,10.4) | 137.4<br>26.3(21.9,4.4)  |  |  |  |  |  |  |
|                | 1.2 | 137.8<br>42.3(27.0,15.3)    | 137.8<br>34.8(24.4,10.4)    | 137.7<br>33.5(23.0,10.5)  | 137.6<br>27.1(18.3,8.8)  | 137.6<br>23.6(18.0,5.6)  |                          |  |  |  |  |  |  |
|                | 1.4 | 137.8<br>36.8(23.4,13.4)    | 137.9<br>34.4(23.6,10.9)    | 137.9<br>30.4(21.2,9.2)   |                          |                          |                          |  |  |  |  |  |  |
| 0.525          | 1   | 137.4<br>46.9(26.9,20.1)    | 137.5<br>39.4(24.6,14.8)    | 137.3<br>37.2(24.5,12.7)  | 137.4<br>32.4(24.6,7.8)  | 137.4<br>28.5(22.7,5.8)  | 137.4<br>24.0(19.1,4.9)  |  |  |  |  |  |  |
|                | 1.2 | 137.5<br>39.7(23.1,16.6)    | 137.8<br>33.6(24.3,9.3)     | 137.6<br>28.7(19.9,8.8)   | 137.4<br>26.5(21.6,4.9)  | 137.5<br>18.7(15.7,3.0)  |                          |  |  |  |  |  |  |
|                | 1.4 | 138.0<br>33.3(22.3,11.0)    | 137.8<br>28.4(20.6,7.9)     | 137.9<br>27.5(18.7,8.8)   |                          |                          |                          |  |  |  |  |  |  |
| 0.575          | 1   | 137.0<br>46.4(27.0,19.4)    | 137.5<br>38.8(27.9,10.9)    | 137.2<br>28.5(21.6,6.9)   | 137.3<br>28.1(23.3,4.8)  | 137.1<br>21.0(19.4,1.5)  | 137.5<br>24.8(23.0,1.8)  |  |  |  |  |  |  |
|                | 1.2 | 137.5<br>31.4(24.4,7.0)     | 137.6<br>30.8(25.3,5.5)     | 137.3<br>24.2(21.7,2.5)   | 137.5<br>21.0(19.7,1.2)  | 137.3<br>18.1(16.3,1.8)  |                          |  |  |  |  |  |  |
|                | 1.4 | 137.6<br>31.1(24.9,6.2)     | 137.7<br>25.3(19.0,6.3)     | 137.5<br>19.4(18.9,0.5)   |                          |                          |                          |  |  |  |  |  |  |
| 0.625          | 1   | 135.9<br>42.4(22.9,19.5)    | 136.2<br>35.4(25.5,9.8)     | 136.8<br>27.7(22.8,4.9)   | 136.8<br>24.0(20.5,3.4)  | 136.8<br>20.9(18.4,2.5)  | 136.9<br>18.6(17.2,1.5)  |  |  |  |  |  |  |
|                | 1.2 | 136.8<br>28.3(21.2,7.0)     | 136.7<br>22.1(17.6,4.5)     | 136.8<br>21.5(18.6,2.9)   | 136.8<br>14.8(14.4,0.4)  | 136.9<br>10.9(10.7,0.2)  |                          |  |  |  |  |  |  |
|                | 1.4 | 136.9<br>21.1(19.5,1.6)     | 137.0<br>16.1(14.2,1.8)     | 136.8<br>13.1(12.1,1.1)   |                          |                          |                          |  |  |  |  |  |  |
| 0.65           | 1   | 136.0<br>36.9(24.1,12.9)    | 136.4<br>30.0(22.3,7.7)     | 136.6<br>23.9(19.2,4.7)   | 136.8<br>18.4(15.7,2.8)  | 136.8<br>15.3(13.9,1.4)  | 136.96<br>11.4(11.0,0.4) |  |  |  |  |  |  |
|                | 1.2 | 136.7<br>27.5(23.6,3.9)     | 136.8<br>21.6(19.7,1.9)     | 136.8<br>14.6(13.8,0.7)   | 136.8<br>10.6(9.7,0.8)   | 136.9<br>7.5(7.3,0.2)    |                          |  |  |  |  |  |  |
|                | 1.4 | 136.9,0.7<br>18.6(16.5,2.0) | 136.9,0.5<br>14.9(13.9,1.0) | 136.8,0.3<br>8.5(7.7,0.7) |                          |                          |                          |  |  |  |  |  |  |
| 0.7            | 1   | 135.5<br>35.9(24.6,11.3)    | 136.6<br>29.8(23.1,6.8)     | 136.4<br>26.4(22.2,4.2)   | 136.8<br>20.6(18.1,2.5)  | 137.1<br>14.3(12.3,1.9)  | 137.1<br>12.3(11.6,0.7)  |  |  |  |  |  |  |
|                | 1.2 | 136.7<br>26.5(20.2,6.3)     | 136.7<br>21.5(18.3,3.2)     | 137.0<br>12.5(11.2,1.3)   | 137.2<br>12.7(11.9,0.7)  | 137.0<br>9.3(8.6,0.7)    |                          |  |  |  |  |  |  |
|                | 1.4 | 137.0<br>16.6(16.0,0.6)     | 137.0<br>13.1(11.8,1.2)     | 137.0<br>10.1(9.7,0.4)    |                          |                          |                          |  |  |  |  |  |  |

Table 1: Average angle (top value) and permutation frequency values (bottom values), for  $0.475 \leq \Gamma \leq 0.7$

| $\Gamma \mid E^*$ | $\beta$ | 9                        | 10                      | 11                      | 12                      | 13                      | 14                      |
|-------------------|---------|--------------------------|-------------------------|-------------------------|-------------------------|-------------------------|-------------------------|
| 0.75              | 1       | 136.5<br>32.6(21.6,11.0) | 136.2<br>30.7(21.2,9.5) | 136.7<br>22.8(18.1,4.7) | 137.3<br>15.5(11.9,3.5) | 137.6<br>11.4(10.5,0.9) | 137.4<br>10.6(10.6,0.0) |
|                   | 1.2     | 136.9<br>22.4(19.6,2.8)  | 136.5<br>21.4(17.4,4.0) | 136.6<br>11.1(10.1,1.0) | 137.3<br>10.0(9.2,0.9)  | 137.3<br>6.9(6.9,0.0)   |                         |
|                   | 1.4     | 136.5<br>16.5(14.9,1.7)  | 136.9<br>14.8(12.4,2.4) | 137.0<br>8.7(8.3,0.4)   |                         |                         |                         |
| 0.8               | 1       | 137.2<br>32.3(23.2,9.1)  | 136.6<br>29.0(21.2,7.8) | 137.3<br>19.8(14.1,5.7) | 137.7<br>14.7(12.4,2.3) | 138.3<br>10.7(9.7,0.9)  | 137.9<br>10.5(9.6,0.9)  |
|                   | 1.2     | 136.4<br>25.6(19.7,5.9)  | 136.6<br>21.5(18.1,3.4) | 137.4<br>11.7(10.4,1.2) | 136.8<br>13.6(12.4,1.1) | 137.7<br>7.2(7.0,0.2)   |                         |
|                   | 1.4     | 136.5<br>15.9(13.5,2.4)  | 137.2<br>11.2(10.8,0.4) | 137.2<br>8.3(8.3,0.0)   |                         |                         |                         |
| 0.85              | 1       | 138.5<br>22.7(15.7,7.0)  | 138.5<br>17.6(13.5,4.1) | 138.9<br>10.9(10.5,0.4) | 138.8<br>9.4(9.2,0.2)   | 138.7<br>8.2(7.8,0.4)   | 139.1<br>4.0(3.6,0.4)   |
|                   | 1.2     | 137.7<br>18.1(14.5,3.6)  | 138.0<br>11.9(11.0,0.9) | 138.3<br>9.2(8.8,0.4)   | 138.2<br>7.3(6.9,0.4)   | 138.5<br>4.0(4.0,0.0)   |                         |
|                   | 1.4     | 137.6<br>12.2(11.5,0.7)  | 137.6<br>9.6(8.2,1.4)   | 137.9<br>4.5(4.5,0.0)   |                         |                         |                         |
| 0.9               | 1       | 138.7<br>20.6(14.5,6.1)  | 139.3<br>15.8(10.7,5.1) | 139.5<br>10.7(9.0,1.6)  | 139.5<br>7.2(6.1,1.1)   | 139.7<br>5.5(5.3,0.2)   | 140.0<br>2.3(2.3,0.0)   |
|                   | 1.2     | 138.3<br>17.8(14.8,3.1)  | 138.6<br>11.4(8.3,3.1)  | 138.9<br>8.9(8.1,0.8)   | 138.7<br>7.1(6.9,0.2)   | 139.1<br>4.0(4.0,0.0)   |                         |
|                   | 1.4     | 138.1<br>11.9(11.2,0.7)  | 138.4<br>8.3(8.1,0.2)   | 138.5<br>4.5(4.5,0.0)   |                         |                         |                         |
| 0.95              | 1       | 139.8<br>17.7(14.3,3.3)  | 139.9<br>11.7(9.8,1.8)  | 139.7<br>8.9(7.6,1.2)   | 140.1<br>4.8(4.4,0.4)   | 139.9<br>4.4(4.2,0.2)   | 139.9<br>2.7(2.7,0.0)   |
|                   | 1.2     | 139.4<br>10.3(9.3,1.0)   | 139.5<br>6.0(6.0,0.0)   | 139.3<br>5.3(5.3,0.0)   | 139.6<br>4.1(3.8,0.4)   |                         |                         |
|                   | 1.4     | 139.0<br>8.2(7.5,0.7)    | 138.9<br>6.5(6.5,0.0)   | 139.3<br>2.9(2.9,0.0)   |                         |                         |                         |
| 0.975             | 1       | 140.2<br>17.7(16.3,1.4)  | 139.5<br>7.7(6.9,0.8)   | 140.3<br>7.3(7.3,0.0)   | 140.2<br>3.7(3.7,0.0)   | 140.3<br>3.5(3.5,0.0)   | 140.3<br>1.2(1.2,0)     |
|                   | 1.2     | 139.7<br>10.0(8.6,1.4)   | 139.9<br>5.7(5.1,0.6)   | 139.8<br>4.0(3.6,0.4)   | 140.1<br>1.7(1.7,0.0)   | 140.1<br>0.8(0.8,0.0)   |                         |
|                   | 1.4     | 139.3<br>8.0(7.9,0.2)    | 139.5<br>4.8(4.6,0.2)   | 139.5<br>2.6(2.6,0.0)   |                         |                         |                         |

Table 2: Average angle (top value) and permutation frequency values (bottom values), for  $0.75 \leq \Gamma \leq 0.975$
